# Supplementary material for: Solution assembly MoS2nanopetals/GaAs n–n homotype heterojunction with ultrafast and low noise photoresponse using graphene as carrier collector
Source: Royal Society of Chemistry journal article supplement (doi:10.1039/c6tc04414j), 2016-11-25
Supplement: c6tc04414j1.pdf [file c6tc04414j1.pdf]

## Supporting Information

### **Solution assembly MoS<sub>2</sub> nanopetals /GaAs n-n homotype heterojunction with ultrafast and low noise photoresponse using graphene as carrier collector**

Yan Zhang,<sup>ab</sup> Yongqiang Yu,<sup>b</sup> Xiaoyan Wang,<sup>a</sup> Guoqing Tong,<sup>c</sup> Longfei Mi,<sup>a</sup> Zhifeng  
Zhu,<sup>ab</sup> Xiangshun Geng<sup>b</sup> and Yang Jiang<sup>\*a</sup>

<sup>a</sup> *School of Materials Science and Engineering, Hefei University of Technology, Hefei,  
Anhui, 230009, P. R. China.*

<sup>b</sup> *School of Electronic Science and Applied Physics, Hefei University of Technology,  
Hefei, Anhui, 230009, P. R. China.*

<sup>c</sup> *National Laboratory of Solid State Microstructures and School of Electronics,  
Science and Engineering/Collaborative Innovation Centre of Advanced  
Microstructures, Nanjing University, Nanjing, Jiangsu, 210093, P. R. China*

\* Corresponding author. **Email:** apjiang@hfut.edu.cn, apjiang2002@yahoo.com

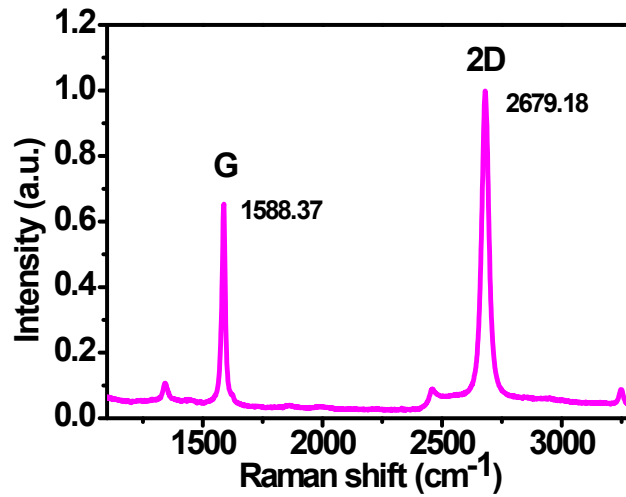

**Fig. S1** Raman spectrum of graphene used as carrier collector in our device.

*Synthesis of few-layer graphene films (FLG):* The few-layer graphene(FLG) films were synthesized at 1000°C via a chemical vapor deposition (CVD) method by using a mixed gas of CH<sub>4</sub> (40 sccm) and H<sub>2</sub> (20 sccm) as a reaction source, with 30 mm thick Cu foils as the catalytic substrates. After deposition, the graphene films were spin-coated with polymethylmethacrylate solution (PMMA in chlorobenzene, 5 wt%) and the underlying Cu substrates were removed in Marble's reagent solution (CuSO<sub>4</sub>:HCl:H<sub>2</sub>O = 10 g:50 mL:50 mL). The graphene films were rinsed and stored in deionized (DI) water for device fabrication in further.

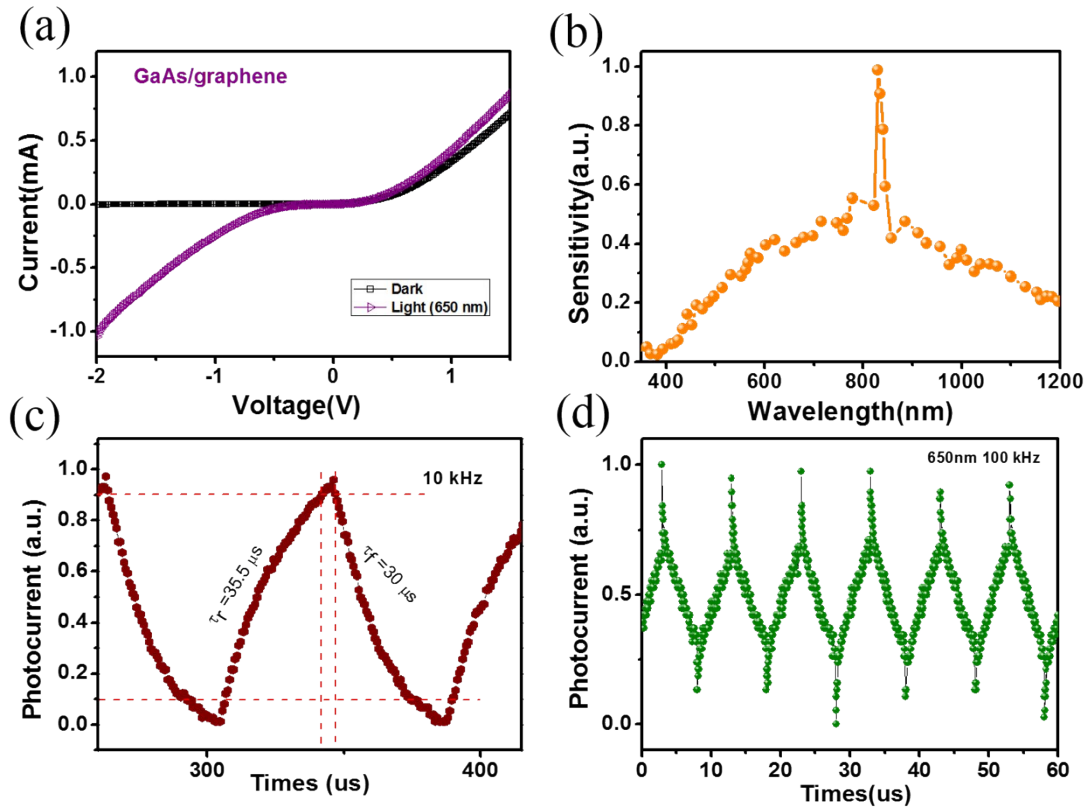

**Fig. S2.** The photo-electric characteristic measurement of GaAs/graphene device used for comparison with our PDs. The measurement is taken under the same condition with Figure 3 and Figure 4. (a) The  $I$ - $V$  curve of GaAs/graphene device under dark and light illumination (650 nm,  $\approx 20 \text{ mWcm}^{-2}$ ), respectively. (b) Spectral response of GaAs/graphene device. (c) and (d) show time response characteristics of the device to the pulsed light at the frequency of 10 kHz and 100 kHz, respectively (650 nm,  $\approx 20 \text{ mW cm}^{-2}$ ).

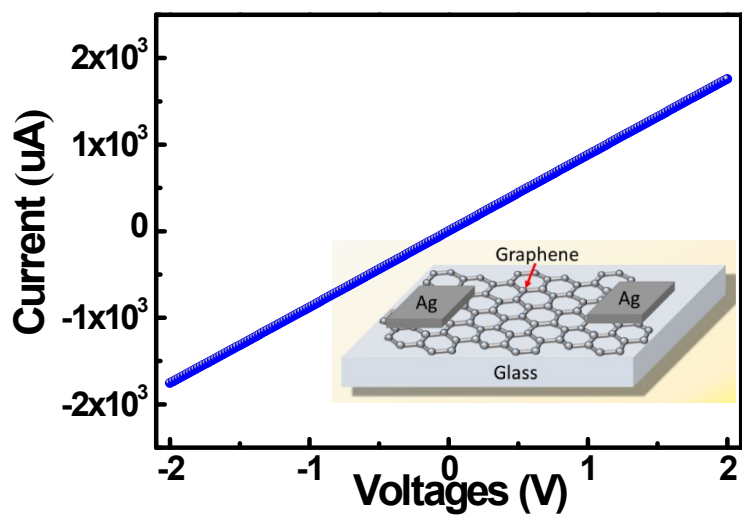

**Fig. S3** The  $I-V$  curve of Ag /Graphene device used to make sure the contact. The measurement is taken at room temperature and the linear behavior suggests reliable ohmic contacts. Inset shows the schematic of the device.

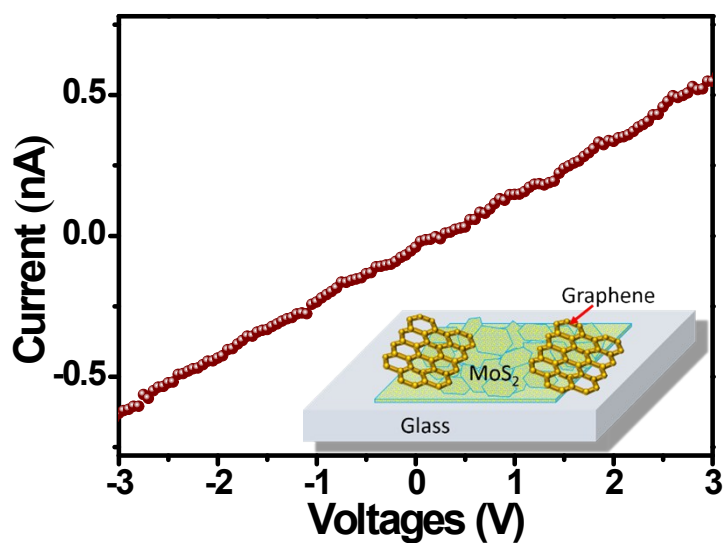

**Fig. S4**  $I-V$  characteristics between two graphene contacts on the MoS<sub>2</sub> nanopetals film taken at room temperature.

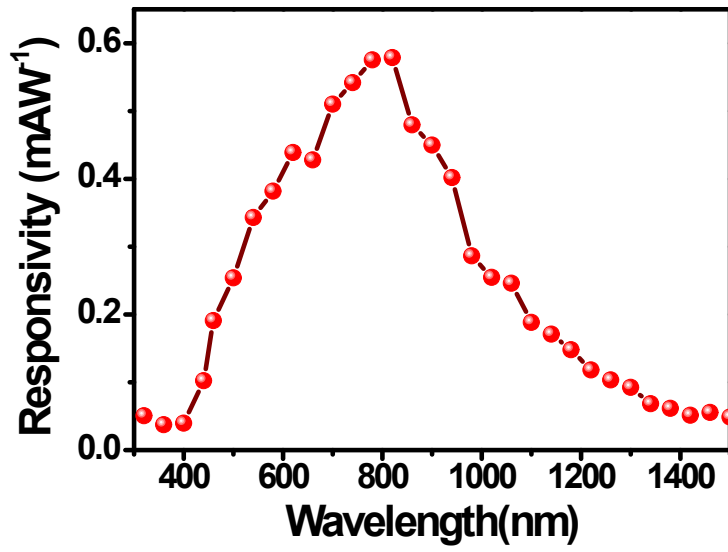

Fig. S5. The wavelength-dependent responsivity (R)

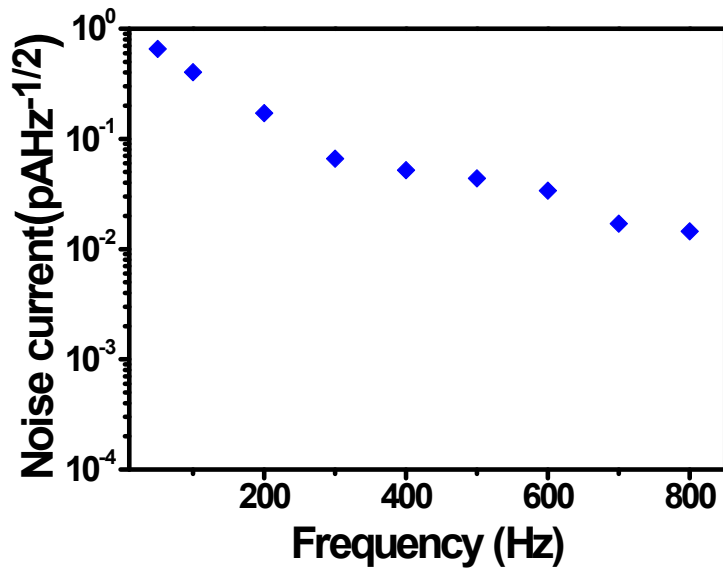

Fig. S6 Measured dark current noise of the photodetectors at different frequencies at zero bias.

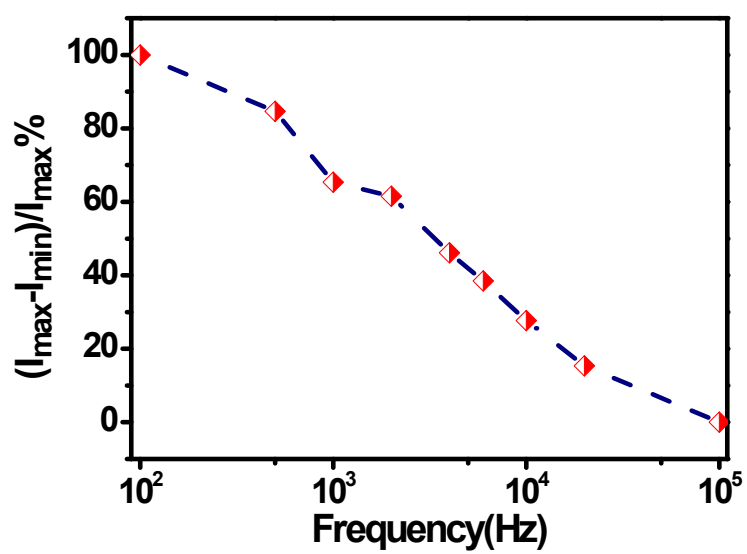

Fig. S7 Frequency dependence of relative balance value  $((I_{\max}-I_{\min})/I_{\max})$ .
